# Supplementary material for: Proteomics profiling reveals novel proteins and functions of the plant stigma exudate
Source: PubMed Central journal article supplement (PMC3871823; doi:10.1093/jxb/ert345), 2013-10-22
Supplement: supp_ert345_jexbot106898_file003.pdf [file supp_ert345_jexbot106898_file003.pdf]

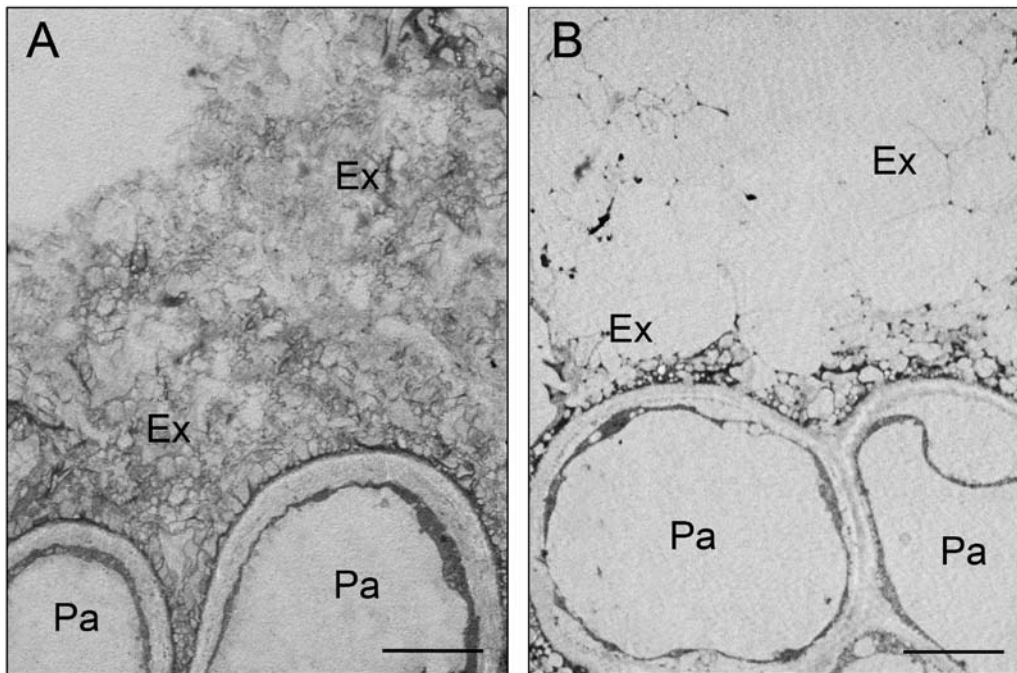

**Supplementary figure S1.** (A) Transmission electron microscopy (TEM) photomicrograph of an olive stigma before pollination showing papillae ultrastructure and the presence of a copious exudate covering its surface. (B) TEM photomicrograph as above showing intact papillae after exudate collection by brushing.
